# Supplementary material for: KxCo1.5−0.5xFe(CN)6/rGO with Dual−Active Sodium Ion Storage Site as Superior Anode for Sodium Ion Battery
Source: MDPI journal article supplement (doi:10.3390/nano13020264), 2023-01-07
Supplement: s1 [file s1]

# $\text{K}_x\text{Co}_{1.5-0.5x}\text{Fe}(\text{CN})_6/\text{rGO}$ with Dual-Active Sodium Ion Storage Site as Superior Anode for Sodium Ion Battery

Gang Zhou <sup>1,\*</sup>, Mincong Fan <sup>1,2</sup>, Lei Wang <sup>2</sup>, Xianglin Li <sup>3,\*</sup>, Danqing Liu <sup>2</sup> and Feng Gao <sup>1</sup>

<sup>1</sup> School of Environment and Civil Engineering, DongGuan University of Technology, Dongguan 523808, China

<sup>2</sup> College of Materials Science and Engineering, Shenzhen University, Shenzhen 518061, China

<sup>3</sup> School of Physics and Chemistry, Hunan First Normal University, Changsha 410205, China

\* Correspondence: hhzhougang@163.com (G.Z.); lixl@idtu.cn (X.L.)

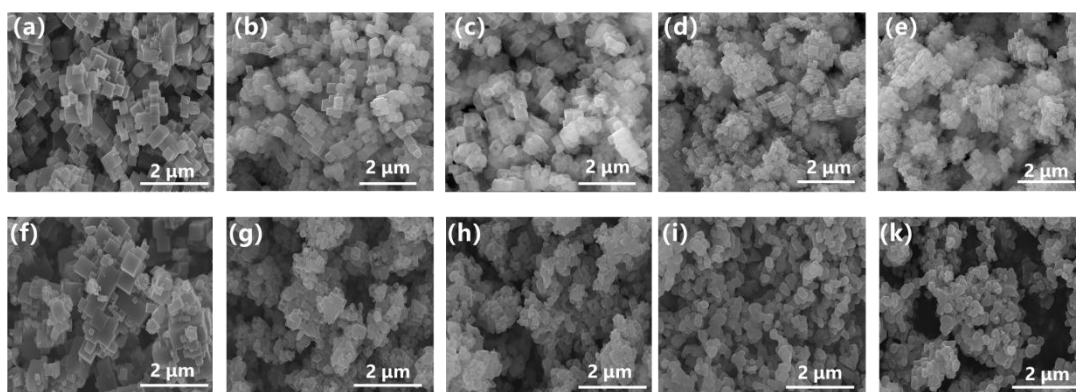

Figure S1. SEM images of (a) KCoHCP-CP; (b) KCoHCP-H1; (c) KCoHCP-H2; (d) KCoHCP-H4; (e) KCoHCP-H12; (f) KCoHCP-CP-EK; (g) KCoHCP-H1-EK; (h) KCoHCP-H2-EK; (i) KCoHCP-H4-EK; (k) KCoHCP-H12-EK;

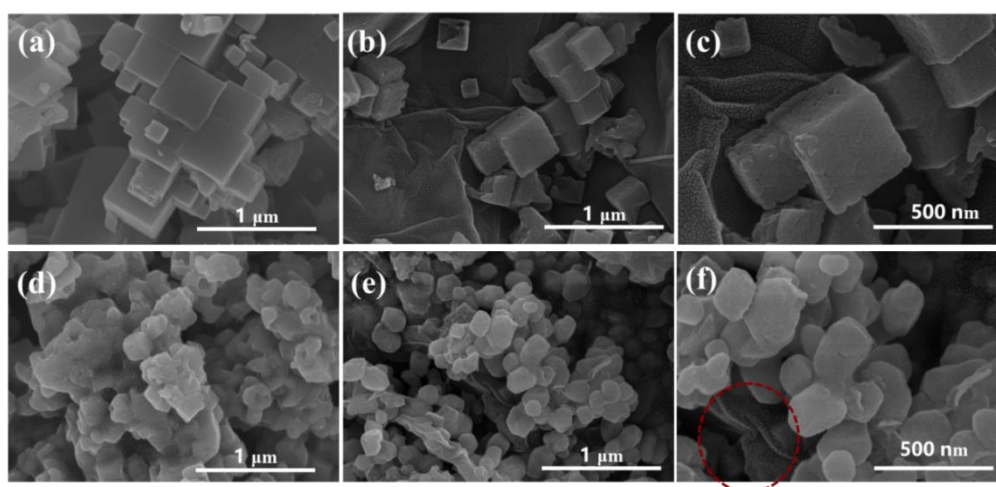

Figure S2. SEM images of (a) KCoHCP-CP-EK; (b-c) KCoHCP-CP-EK/rGO; (d) KCoHCP-H2-

EK; (e-f) KCoHCP-H2-EK/rGO

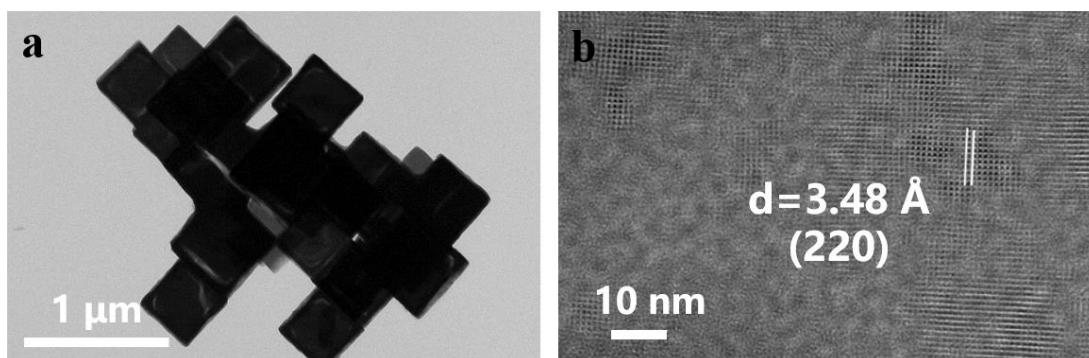

Figure S3. (a) TEM image of KCoHCP-CP-EK and (b) HRTEM image of KCoHCP-CP-EK.

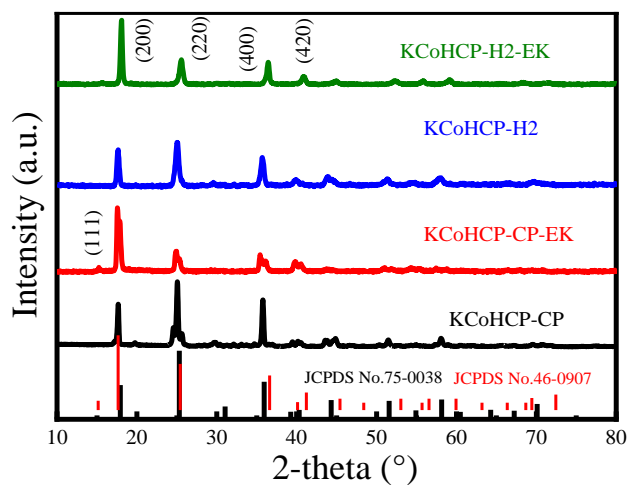

Figure S4. XRD patterns of KCoHCP-CP, KCoHCP-CP-EK, KCoHCP-H2 and KCoHCP-H2-EK

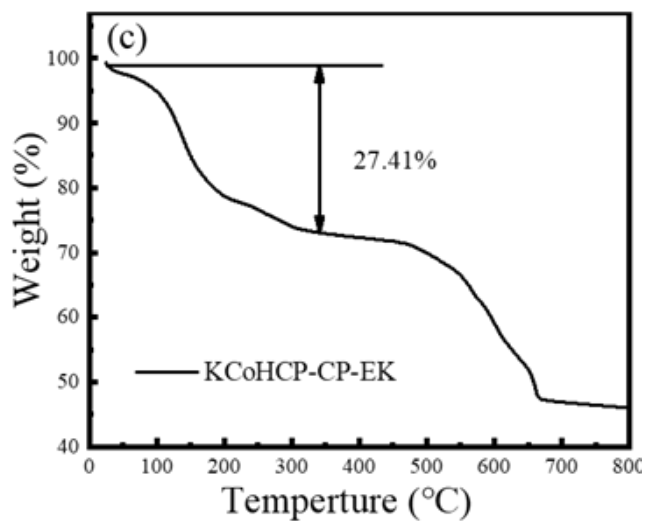

Figure S5. The thermogravimetric curve of KCoHCP-CP-EK

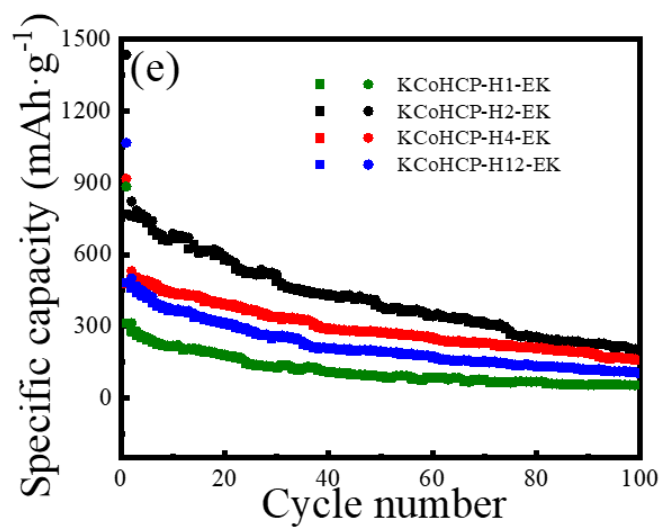

Figure S6. The cycling performance of KCoHCP-Hx-EK at a current density of 0.1 A·g<sup>-1</sup>.

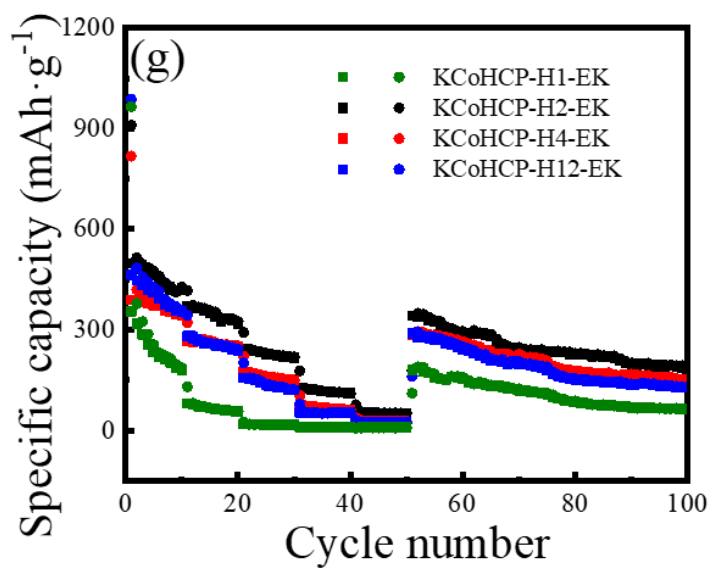

Figure S7. The rate performance of KCoHCP-Hx-EK.
